# Supplementary material for: Maternally and zygotically provided Cdx2 have novel and critical roles for early development of the mouse embryo
Source: PubMed Central journal article supplement (PMC2954319; doi:10.1016/j.ydbio.2010.04.017), 2010-08-01
Supplement: mmc7.pdf [file mmc7.pdf]

# Supplementary Figure 1

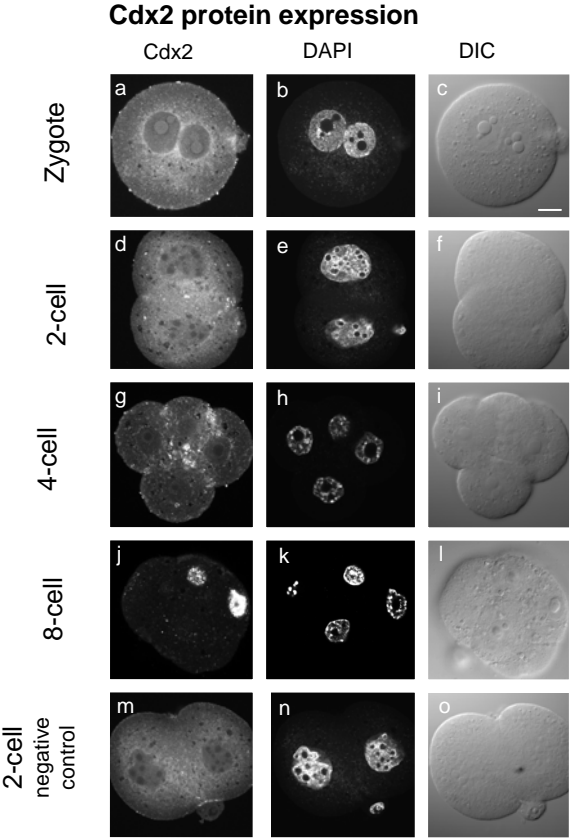

## Supplementary Figure 2

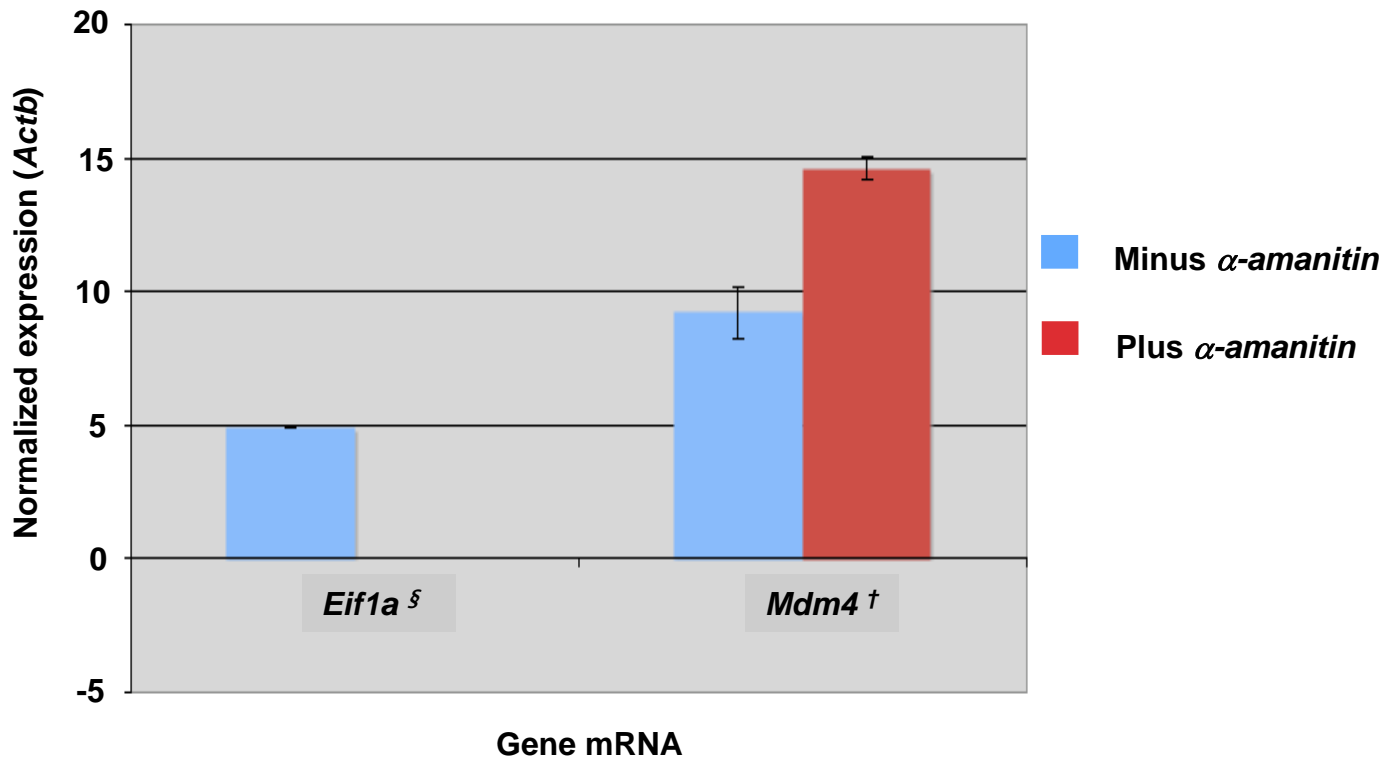

$\S$   $\alpha$ -amanitin sensitive transcript  
 $\dagger$   $\alpha$ -amanitin insensitive transcript

## Supplementary Figure 3

### A Developmental progression of siRNA treated embryos

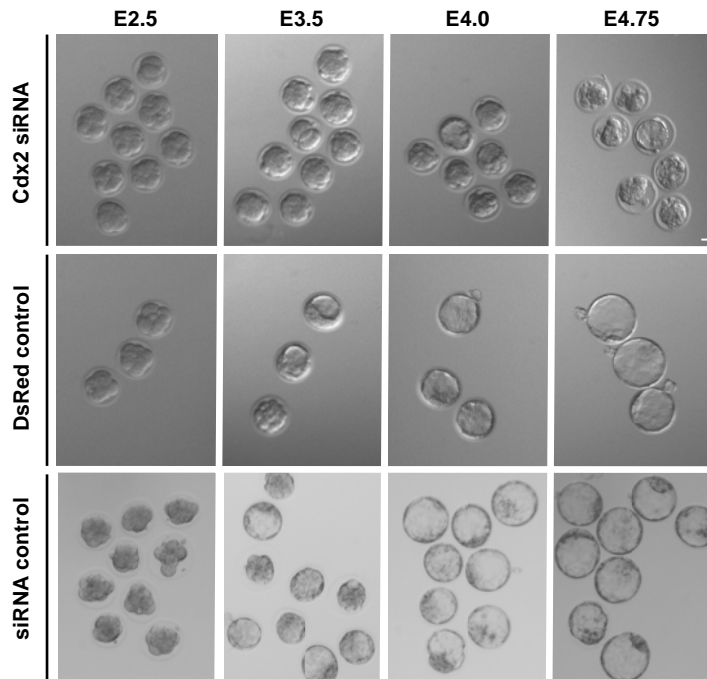

### B Cdx2 expression in Cdx2 siRNA embryos

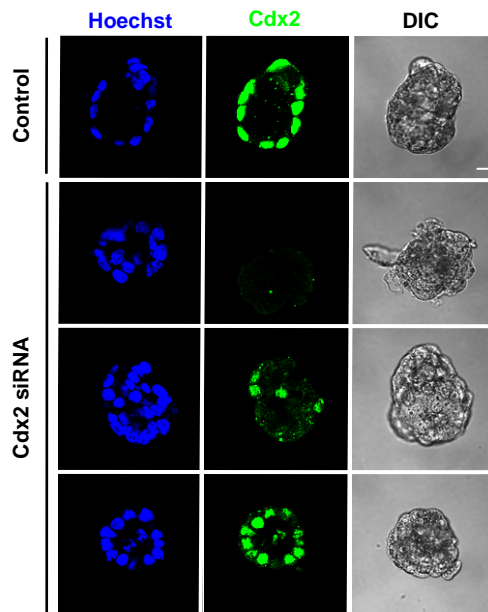

### C Polarity in Cdx2 siRNA embryos

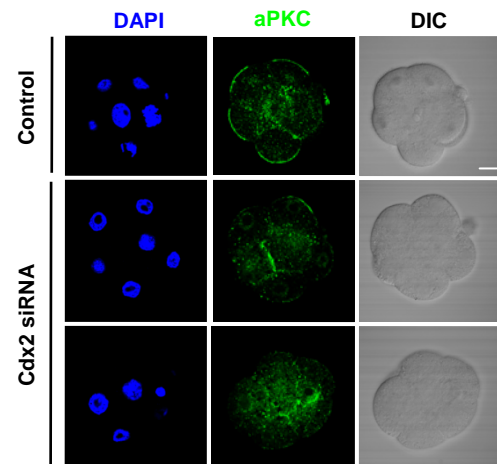

## Supplementary Figure 4

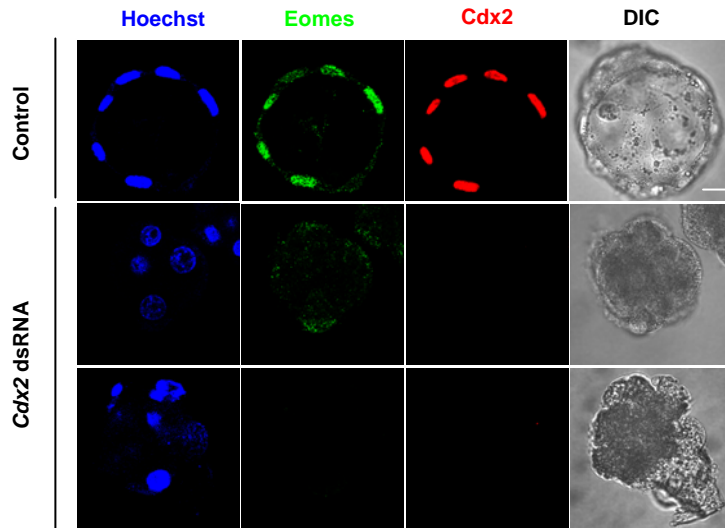

## Supplementary Table 1

### Cell allocation in Cdx2 RNAi embryos

| No        | Number of cells |             |            | Inside position |             |            | Outside position |             |            |
|-----------|-----------------|-------------|------------|-----------------|-------------|------------|------------------|-------------|------------|
|           | Total           | Live        | Dead       | Total           | Live        | Dead       | Total            | Live        | Dead       |
| 1         | 24              | 18          | 6          | 11              | 8           | 3          | 13               | 10          | 3          |
| 2         | 29              | 29          | 0          | 10              | 10          | 0          | 19               | 19          | 0          |
| 3         | 30              | 18          | 12         | 13              | 10          | 3          | 17               | 8           | 9          |
| 4         | 30              | 30          | 0          | 14              | 14          | 0          | 16               | 16          | 0          |
| 5         | 32              | 25          | 7          | 17              | 12          | 5          | 15               | 13          | 2          |
| 6         | 32              | 27          | 5          | 11              | 11          | 0          | 21               | 21          | 0          |
| 7         | 32              | 32          | 0          | 14              | 12          | 2          | 18               | 15          | 3          |
| 8         | 32              | 32          | 0          | 6               | 6           | 0          | 26               | 26          | 0          |
| 9         | 35              | 34          | 1          | 18              | 17          | 1          | 17               | 17          | 0          |
| <b>Av</b> | <b>30.7</b>     | <b>27.2</b> | <b>3.4</b> | <b>12.7</b>     | <b>11.1</b> | <b>1.6</b> | <b>18.0</b>      | <b>16.1</b> | <b>1.9</b> |

### Cell allocation in control embryos

| No        | Number of cells |             |          | Inside position |             |          | Outside position |             |          |
|-----------|-----------------|-------------|----------|-----------------|-------------|----------|------------------|-------------|----------|
|           | Total           | Live        | Dead     | Total           | Live        | Dead     | Total            | Live        | Dead     |
| 1         | 32              | 32          | 0        | 11              | 11          | 0        | 21               | 21          | 0        |
| 2         | 32              | 32          | 0        | 9               | 9           | 0        | 23               | 23          | 0        |
| 3         | 32              | 32          | 0        | 10              | 10          | 0        | 22               | 22          | 0        |
| 4         | 32              | 32          | 0        | 10              | 10          | 0        | 22               | 22          | 0        |
| 5         | 32              | 32          | 0        | 11              | 11          | 0        | 21               | 21          | 0        |
| 6         | 32              | 32          | 0        | 10              | 10          | 0        | 22               | 22          | 0        |
| 7         | 33              | 33          | 0        | 12              | 12          | 0        | 21               | 21          | 0        |
| <b>Av</b> | <b>32.1</b>     | <b>32.1</b> | <b>0</b> | <b>10.4</b>     | <b>10.4</b> | <b>0</b> | <b>21.7</b>      | <b>21.7</b> | <b>0</b> |
